# Supplementary material for: Tunable synthesis of ultrathin AuAg nanowires and their catalytic applications
Source: Royal Society of Chemistry journal article supplement (doi:10.1039/c8nr09236b), 2019-01-01
Supplement: c8nr09236b1.pdf [file c8nr09236b1.pdf]

## Supplementary Information

### Tunable synthesis of water soluble ultrathin AuAg nanowires and their catalytic applications

Daniel K. Kehoe, Sarah A. McCarthy and Yurii K. Gun'ko\*

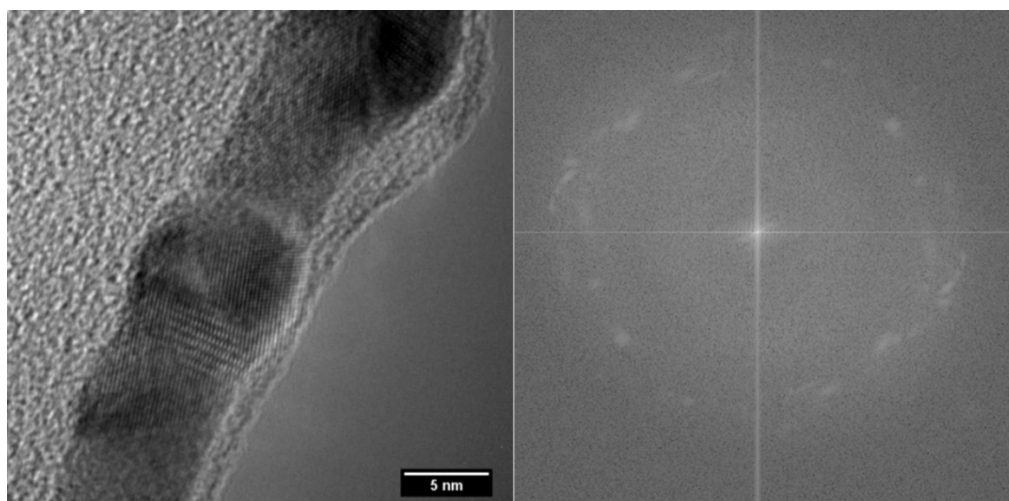

S1: HR-TEM (left) and FFT (right) of ultrathin AuAg NWs produced following dilution after 1 day of aging.

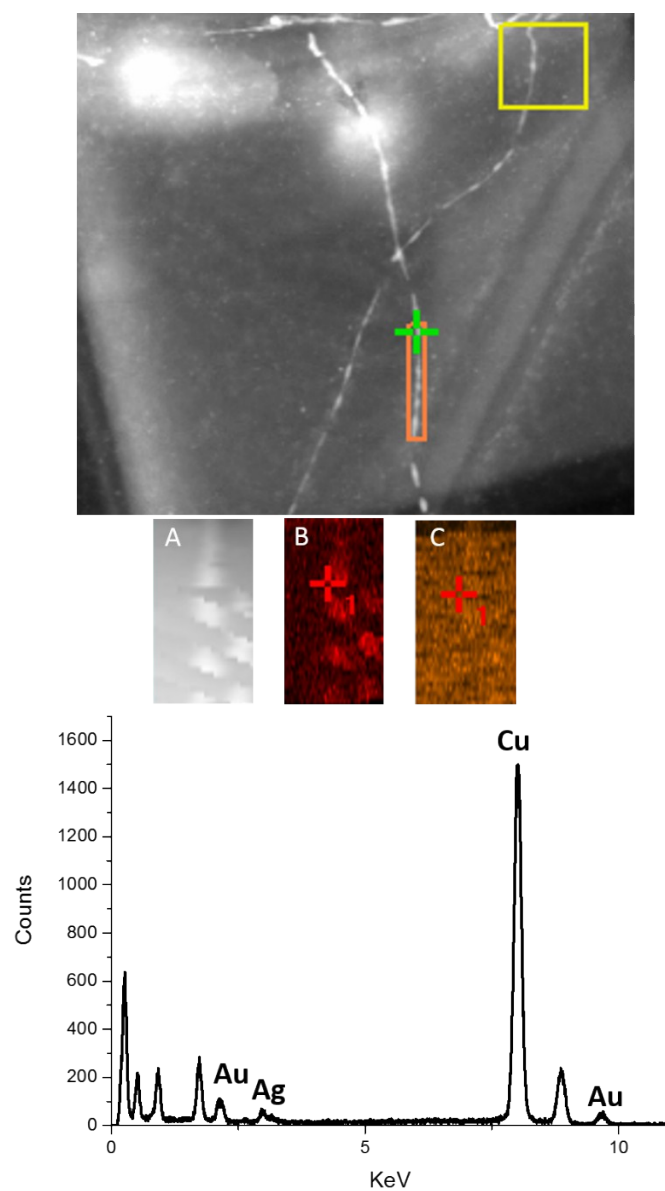

**Figure S2:** HAADF STEM (A) and EDX map of pre-diluted AuAg NWs were and B and C denotes the L-line of Ag and M- line of Au respectively. The associated EDX spectrum (bottom) is also detailed.

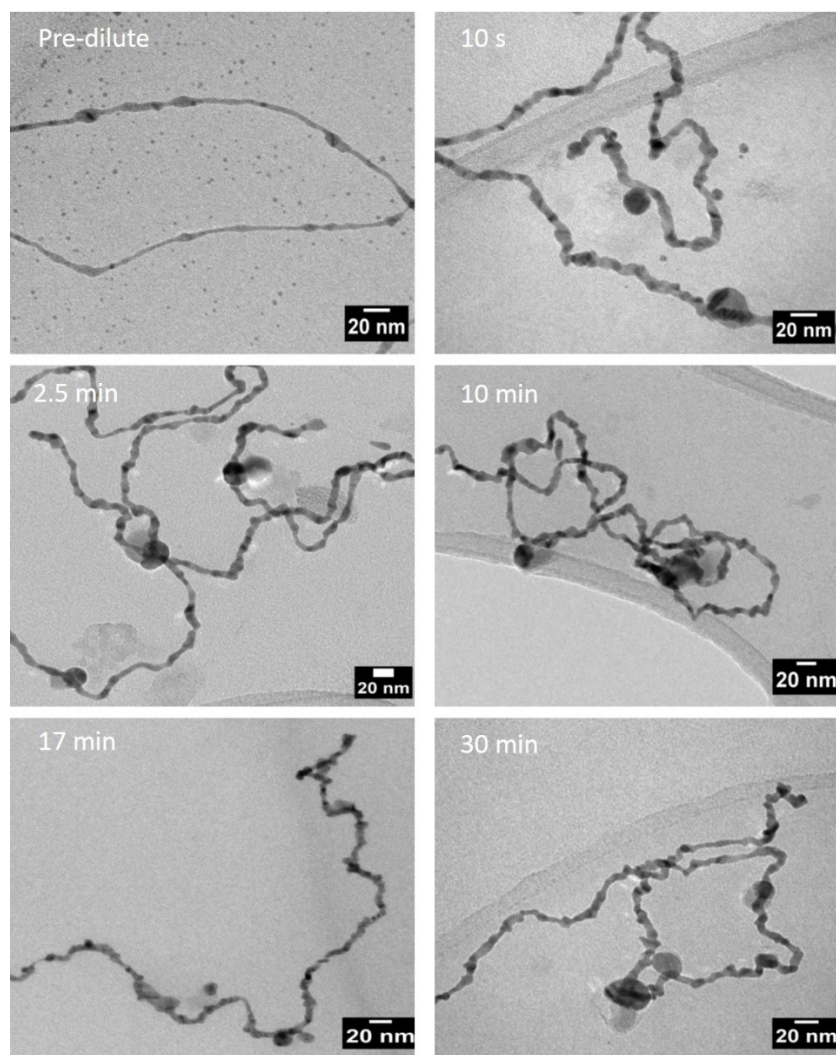

**Figure S3:** TEM analysis monitoring the growth of AuAg nanowires following dilution with water after 18 hrs of aging.

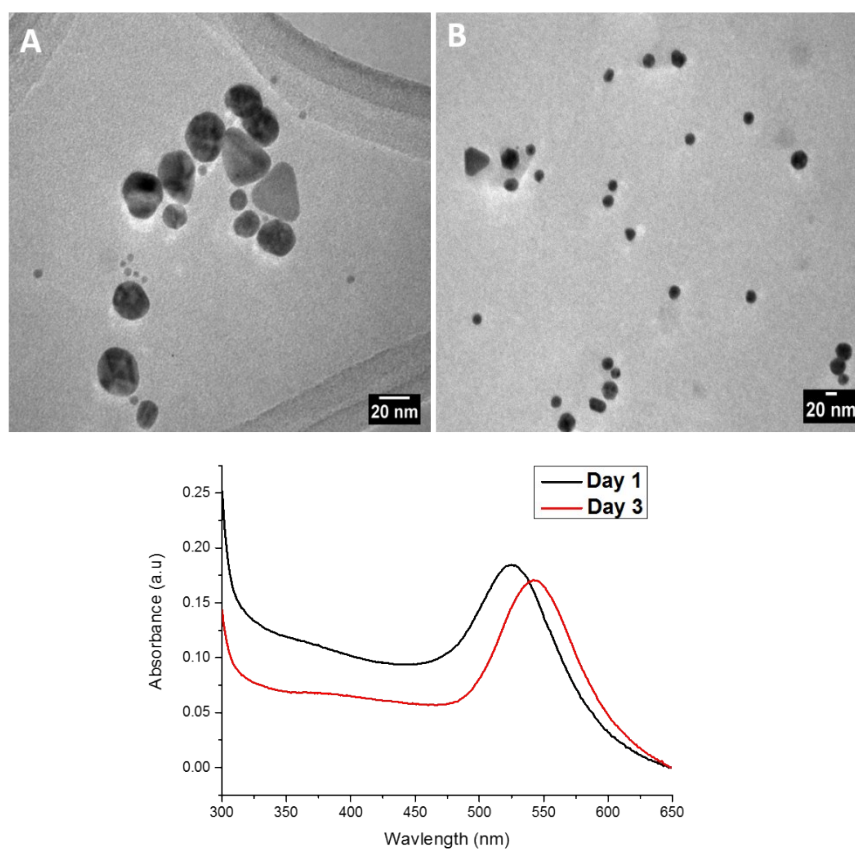

**Figure S4:** TEM image of Au nanoparticles after 1 (A) and 3 (B) days aging following dilution and UV-Vis spectra of products produced following dilution after each day.

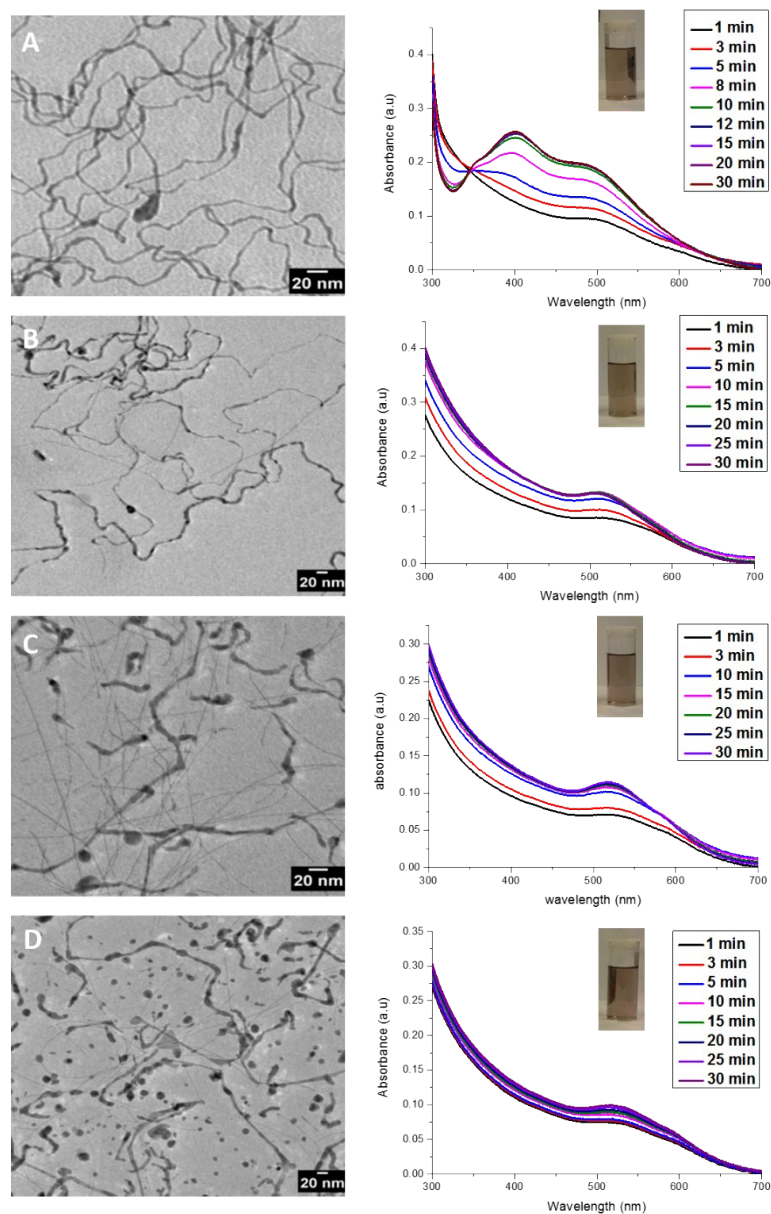

**Figure S5:** TEM images (left) and UV-Vis (right) analysis of nanowires produced following dilution with water (A), methanol (B), ethanol (C) and isopropanol (D) after 2 days of aging. Photograph inset of final solution.

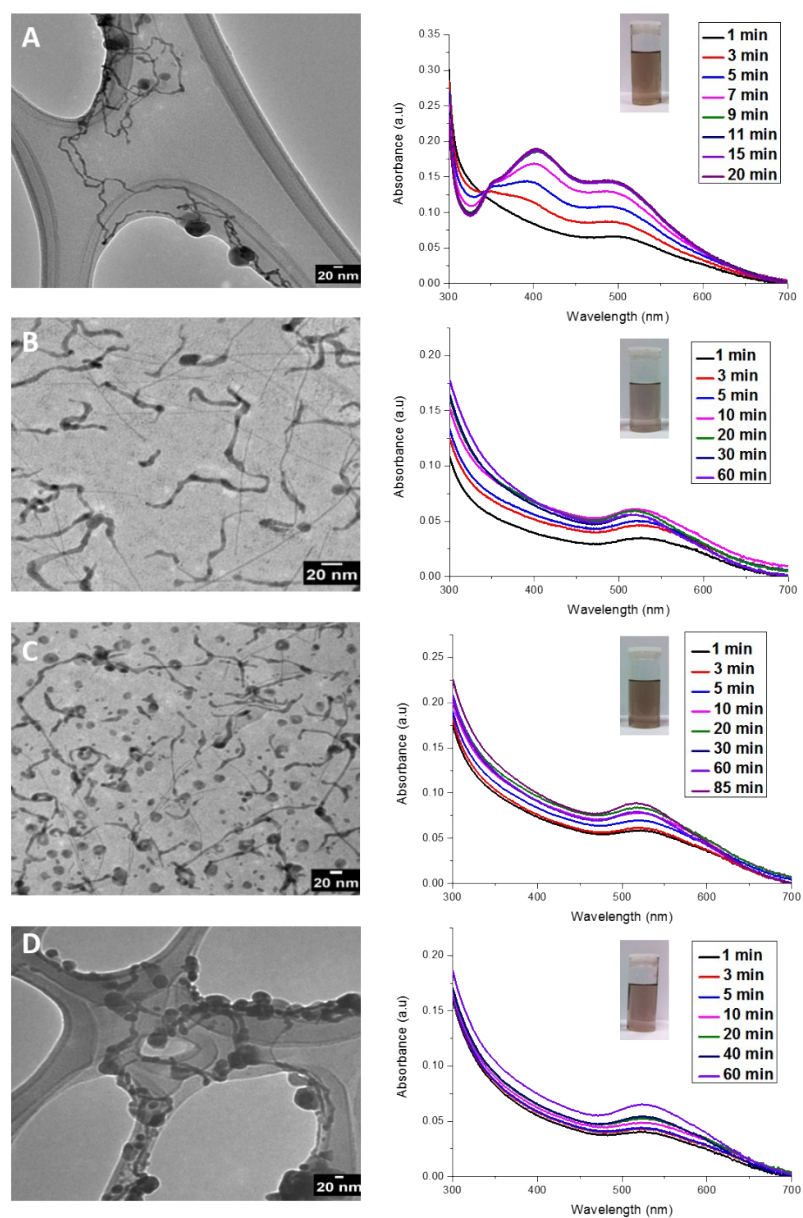

**Figure S6:** TEM images (left) and UV-Vis (right) analysis of nanowires produced following dilution with water (A), methanol (B), ethanol (C) and isopropanol (D) after 3 days of aging. Photograph inset of final solution.

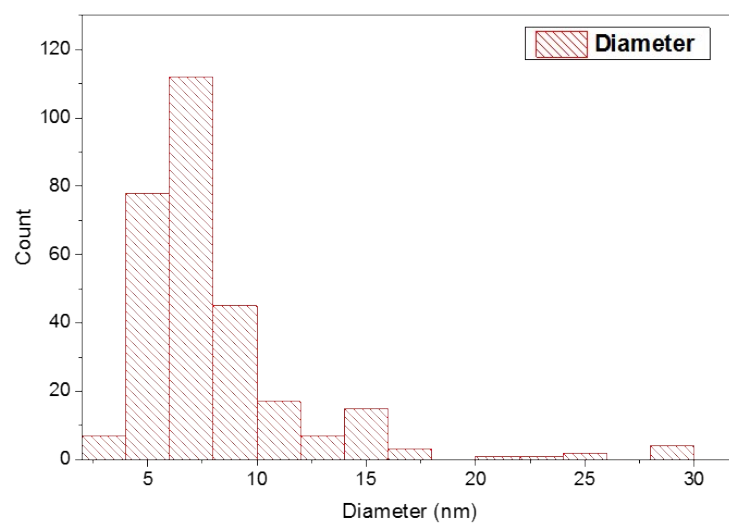

**Figure S7:** Size distribution of ultrathin AuAg NWs produced using a dilution factor of 5 after 1 day of aging with average diameter of 8 nm.

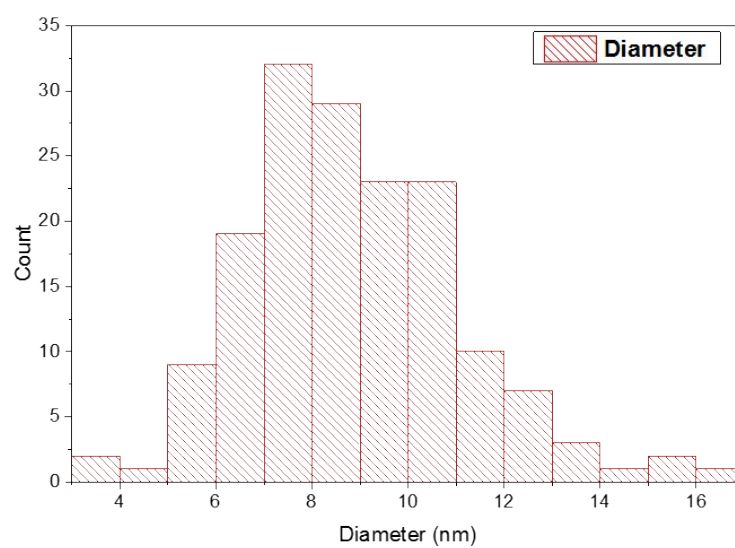

**Figure S8:** Size distribution of ultrathin AuAg NWs produced using a dilution factor of 10 after 1 day of aging with average diameter of 8.8 nm.



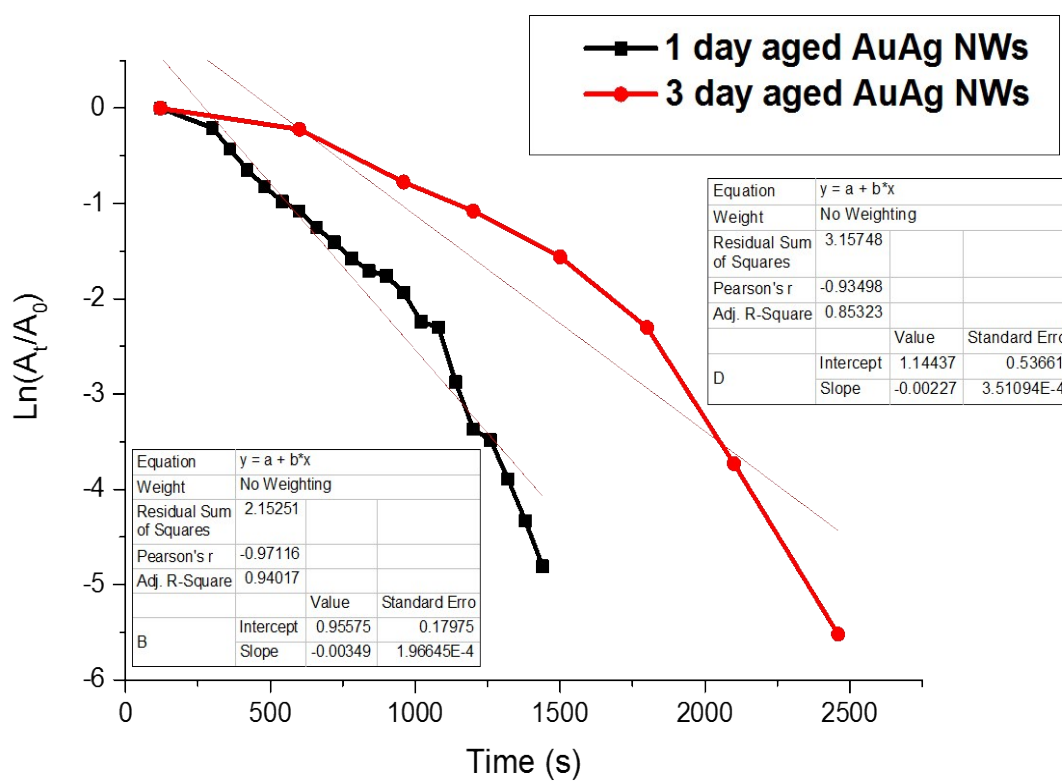

**Figure S9:** kinetic curves for the rate of reduction 4-nitrophenol using ultrathin AuAg nanowires produced after 1 day and 3 days at 400 nm detailing linear fitting.



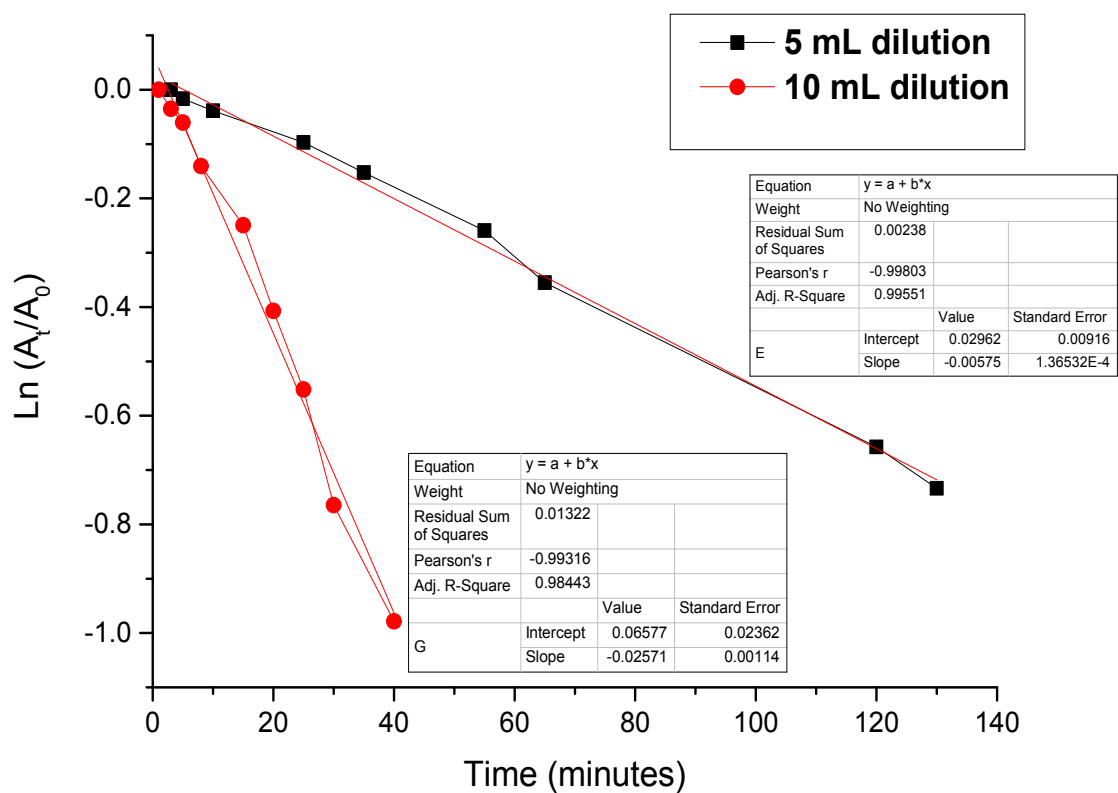

**Figure S10:** Kinetic curves for rate of formation of AuAg nanowires following dilution with 5 and 10 mL at 324 nm detailing linear fitting.

**Table S1:** Catalytic reduction of 4-Nitrophenol by various noble metal nanomaterials

| Catalyst                                                                    | Rate constant ( $10^{-3} \text{ s}^{-1}$ ) | Catalyst loading         |
|-----------------------------------------------------------------------------|--------------------------------------------|--------------------------|
| Ag NW @ Au NP <sup>1</sup><br>0.1% Au/Ag                                    | 0.87                                       | 0.5 mg mL <sup>-1</sup>  |
| 1% Au/Ag                                                                    | 1.4                                        | 0.5 mg mL <sup>-1</sup>  |
| 5% Au/Ag                                                                    | 3.4                                        | 0.5 mg mL <sup>-1</sup>  |
| Ag NWs <sup>1</sup> (30 nm)                                                 | 0.47                                       | 0.45 mg mL <sup>-1</sup> |
| Au NWs (2 nm) on alumina<br>beads <sup>2</sup>                              | 8.8                                        | 2.28 $\mu\text{g}$       |
| Pt <sub>93</sub> Bi <sub>7</sub> NWs <sup>3</sup> (4.1 nm)                  | 0.46                                       | 15 $\mu\text{g}$         |
| Pt <sub>92</sub> Bi <sub>8</sub> NWs <sup>3</sup> (4.7 nm)                  | 2.3                                        | 15 $\mu\text{g}$         |
| Pt <sub>55</sub> Pd <sub>38</sub> Bi <sub>7</sub> NWs <sup>3</sup> (4.4 nm) | 4.3                                        | 15 $\mu\text{g}$         |
| Au@Ag NP <sup>4</sup> (10 nm core)                                          | 0.09                                       | -                        |
| Au NP (6 nm)@GO <sup>5</sup>                                                | 2                                          | -                        |
| Ag NP (7.5 nm)@GO <sup>6</sup>                                              | 3.4                                        | 1.8x10 <sup>-4</sup> M   |
| Au NP@Tween 80 <sup>7</sup> (14 nm)                                         | 1.5                                        | 1 mmol/L                 |
| Ag NP@SiO <sub>2</sub> nanorattles <sup>8</sup>                             | 3.3                                        | 4 mg                     |
| Au@Ag NP on MOF <sup>9</sup>                                                | 4.97                                       | 3.46 mg                  |
| AuAg (8 nm) (this work)                                                     | 3.4                                        | 0.45 mg mL <sup>-1</sup> |
| AuAg (3nm) (this work)                                                      | 2.2                                        | 0.45 mg mL <sup>-1</sup> |

GO = graphene oxide NP = nanoparticle NW = nanowire MOF = metal organic framework

## References

1. H. Fu, X. Yang, X. Jiang, A. Yu, *Langmuir : the ACS journal of surfaces and colloids*, 2013, **29**, 7134-7142.
2. S. Kundu, A. Leelavathi, G. Madras, N. Ravishankar, *Langmuir*, 2014, **30**, 12690-12695.
3. Y. Y. Shen, Y. Sun, L. N. Zhou, Y. J. Li, E. S. Yeung, *Journal of Materials Chemistry A*, 2014, **2**, 2977-2984.
4. K. K. Halder, S. Kundu, A. Patra, *ACS Applied Materials & Interfaces*, 2014, **6**, 21946-21953.

5. Y. Choi, H. S. Bae, E. Seo, S. Jang, K. H. Park, B.-S. Kim, *Journal of Materials Chemistry*, 2011, **21**, 15431-15436.
6. T. Wu, L. Zhang, J. Gao, Y. Liu, C. Gao, J. Yan, *Journal of Materials Chemistry A*, 2013, **1**, 7384-7390.
7. P. Suchomel, L. Kvitek, R. Pucek, A. Panacek, A. Halder, S. Vajda, R. Zboril, *Scientific Reports*, 2018, **8**, 1-11.
8. J. Hou, B. Yu, E.-g. Liu, W.-b. Dong, P.-c. Lu, Z. Wang, V. C. Yang, J.-b. Gong, *RSC Advances*, 2016, **6**, 95263-95272.
9. H.-L. Jiang, T. Akita, T. Ishida, M. Haruta, Q. Xu, *Journal of the American Chemical Society*, 2011, **133**, 1304-1306.
